# Supplementary material for: Rational design of mesoporous chiral MOFs as reactive pockets in nanochannels for enzyme-free identification of monosaccharide enantiomers
Source: Royal Society of Chemistry journal article supplement (doi:10.1039/d2sc05784k), 2023-01-01
Supplement: d2sc05784k1.pdf [file d2sc05784k1.pdf]

**Supplementary Information**

**Rational Design of Mesoporous Chiral MOFs as Reactive Pockets in Nanochannels for Enzyme-Free Identification of Monosaccharide Enantiomers**

Junli Guo,<sup>a</sup> Xuao Liu,<sup>a</sup> Junjian Zhao,<sup>a</sup> Huijie Xu,<sup>a</sup> Zhida Gao,<sup>a</sup> Zeng-Qiang Wu,<sup>\*b</sup> and Yan-

Yan Song<sup>\*a</sup>

<sup>a</sup>College of Sciences, Northeastern University, Shenyang 110819, China

<sup>b</sup>School of Public Health, Nantong University, Nantong, 226019, China

**Corresponding Authors**

E-mail: yysong@mail.neu.edu.cn

E-mail: zqwu@ntu.edu.cn

## EXPERIMENTAL SECTION

**Chemicals and reagents.** Ti sheets (0.1 mm thickness, 99.6% purity) were purchased from Baosheng Hardware (Bao ji). 1,4-dicarboxybenzene (BDC), Cupric acetate monohydrate ( $\text{Cu}(\text{CH}_3\text{COO})_2 \cdot \text{H}_2\text{O}$ ), Hexadecyltrimethylammonium bromide (CTAB), L-Phenylalanine (L-Phe) were purchased from Aladdin. Ammonium fluoride ( $\text{NH}_4\text{F}$ ), ethylene glycol, N, N-dimethylformamide (DMF, 99.8%), methanol ( $\text{CH}_3\text{OH}$ ), and other chemicals were purchased from Sinopharm Chemical Reagent and used as received without further purification. All aqueous solutions were prepared using Millipore Milli-Q water with a resistivity of 18.0  $\text{M}\Omega \cdot \text{cm}$ .

**Apparatus.** Morphology was characterized using a field-emission scanning electron microscope (Hitachi SU8000, Japan). A JEOL 2000FX high-resolution transmission electron microscope (HRTEM) (Japan) was used to record TEM and HRTEM images. Crystal structures were identified by XRD acquired using an X'Pert XRD spectrometer (Philips, USA) using a  $\text{CuK}\alpha$  X-ray source. Zeta potential was measured using a Zetasizer Nano ZS90 analyzer (Malvern, USA). UV-vis absorption spectra were recorded using a Perkin-Elmer spectrometer (Lambda 750S, USA). FTIR spectroscopy was performed using a Nicolet 6700 instrument (Thermo Fisher, USA). Surface-enhanced Raman scattering (SERS) measurements were conducted using a Raman microscopy spectrometer (LabRAMHR, HORIBA Scientific, France). A CHI660D electrochemical workstation (CH Instrument, USA) was used for all electrochemical tests equipped with two Ag/AgCl electrodes as the anode and cathode. Photocatalytic reduction of  $\text{Cu}^{2+}$  to CuNPs reactions were performed under the irradiation of a ultraviolet LED (3.0 W, wavelength: 365 nm). The enhanced enzyme-like activities were performed under the irradiation of 532 nm laser.

### Preparation of $\text{TiO}_2$ M.

$\text{TiO}_2$  nanochannel membranes were grown on Ti foils (15 mm  $\times$  15 mm  $\times$  0.1 mm) by electrochemical anodization. Briefly, Ti foils were first sequentially rinsed with acetone, ethanol, and deionized water and then dried in air. Anodization was carried out in ethylene glycol/lactic acid/water electrolyte containing 0.1 M  $\text{NH}_4\text{F}$  at 120 V and 150 V for 30 min and 2 min, respectively. Samples were dipped in  $\text{H}_2\text{O}_2$  (30%) until titanium substrates were separated from the membrane to obtain an open-ended  $\text{TiO}_2$  nanochannel membrane. The

prepared samples were annealed at 450 °C for 2 h in the air at a heating rate of 3 °C/min.

#### **Preparation of bulk Meso-L-CuMOF.**

In a typical synthesis, 0.232 g (1.0 mmol) copper nitrate hemipentahydrate, and 0.116 g (0.56 mmol) BDC were dissolved in a 10 mL mixture of DMF and CH<sub>3</sub>OH ( $V_{\text{DMF}}: V_{\text{CH}_3\text{OH}} = 1:1$ ). Then CTAB (0.2 g) and chelating agent L-Phe (0.043 g) were added, and the mixture was sonicated for 30 min to form a homogeneous solution. The solution was heated to 80 °C for 24 h under static conditions. The resulting solid was washed with DMF and CH<sub>3</sub>OH to remove unreacted starting materials. Finally, the as-synthesized sample was extracted twice with an ethanol solution to remove the template (CTAB) from the framework ( $t = 4$  h at 60 °C).

#### **Preparation of serum samples.**

For determination of glucose in real samples, a commercial serum sample was directly used without pretreatment (Beijing Solarbio Science & Technology Co., Ltd.). A standard addition method was used to evaluate the reliability of the method. The D-glucose concentrations were obtained using the traditional glucose oxidase–peroxidase method. The concentrations of D-glucose in unspiked and spiked serum samples were determined by diluting it to a linear range.

## Figures

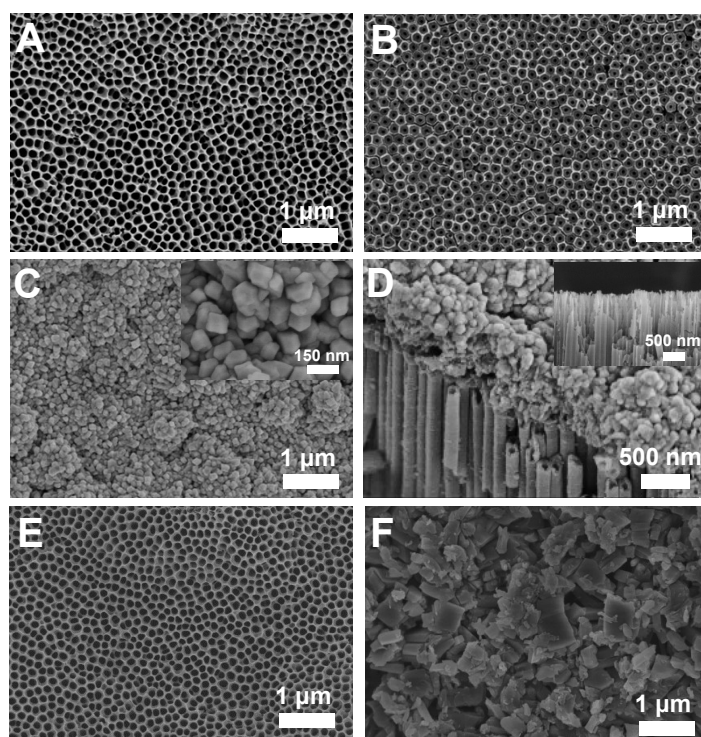

**Figure S1.** (A) Top-view and (B) bottom-view SEM images of TiO<sub>2</sub>M. (C) Bottom-view and (D) side view SEM images of CuNPs/TiO<sub>2</sub>M. (E) Top-view SEM images of Meso-L-CuMOF/TiO<sub>2</sub>M. (F) Bottom-view SEM images of Meso-L-CuMOF/TiO<sub>2</sub>M.

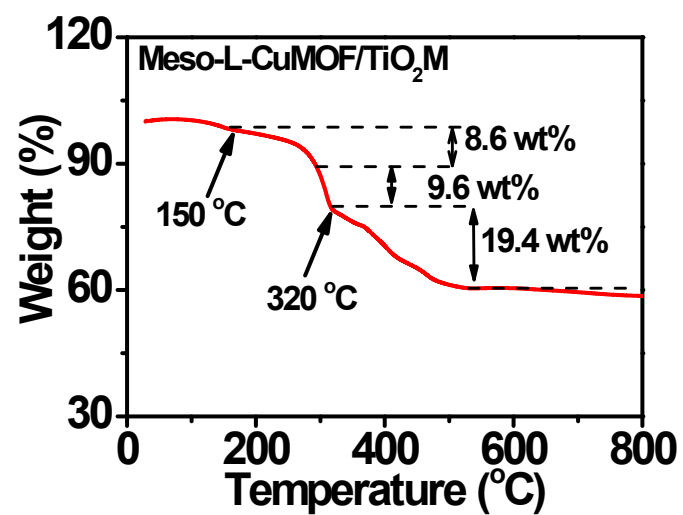

**Figure S2.** TGA analysis of Meso-L-CuMOF/TiO<sub>2</sub>M.

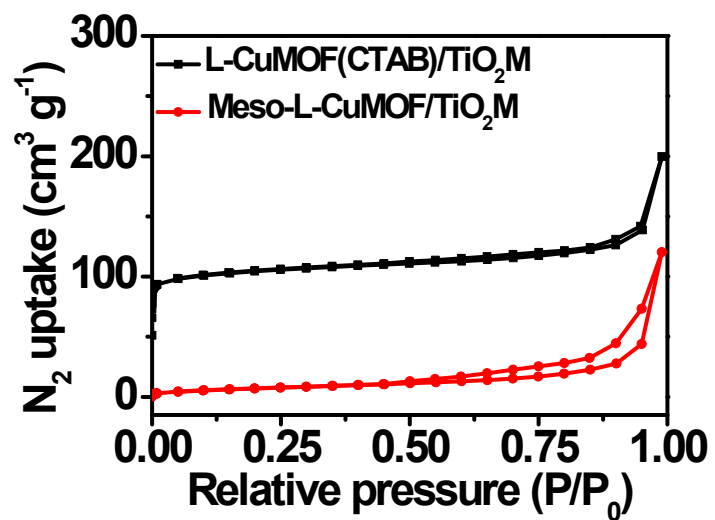

**Figure S3.** N<sub>2</sub> sorption isotherms of L-CuMOF/TiO<sub>2</sub>M before and after CTAB removal.

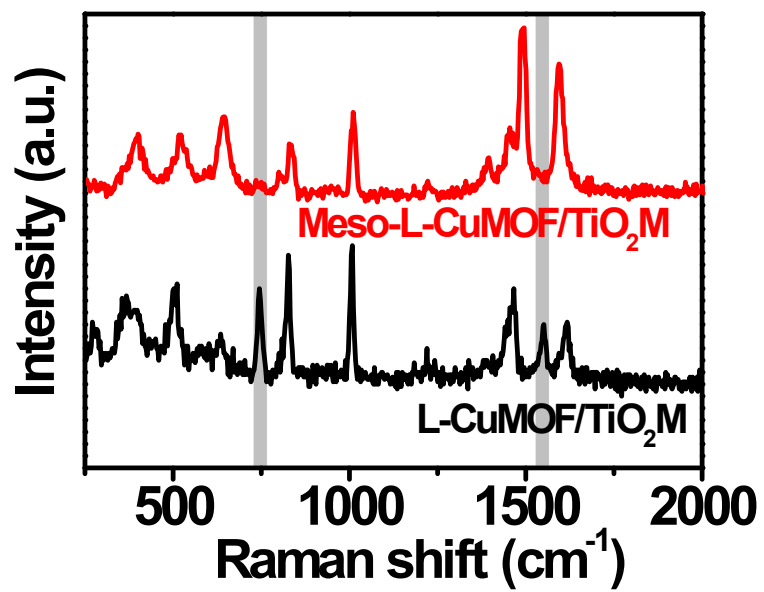

**Figure S4.** Raman spectra of L-CuMOF/TiO<sub>2</sub>M and Meso-L-CuMOF/TiO<sub>2</sub>M.

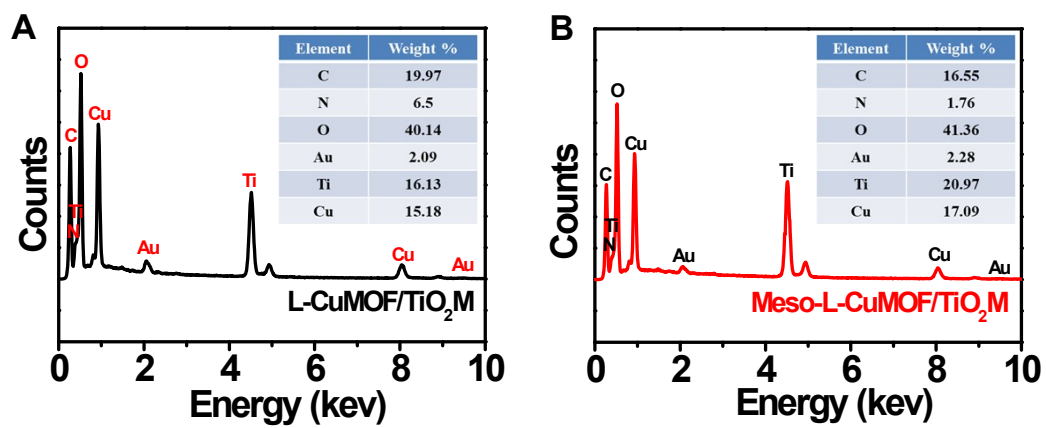

Figure S5. EDS results of (A) L-CuMOF/TiO<sub>2</sub>M and (B) Meso-L-CuMOF/TiO<sub>2</sub>M.



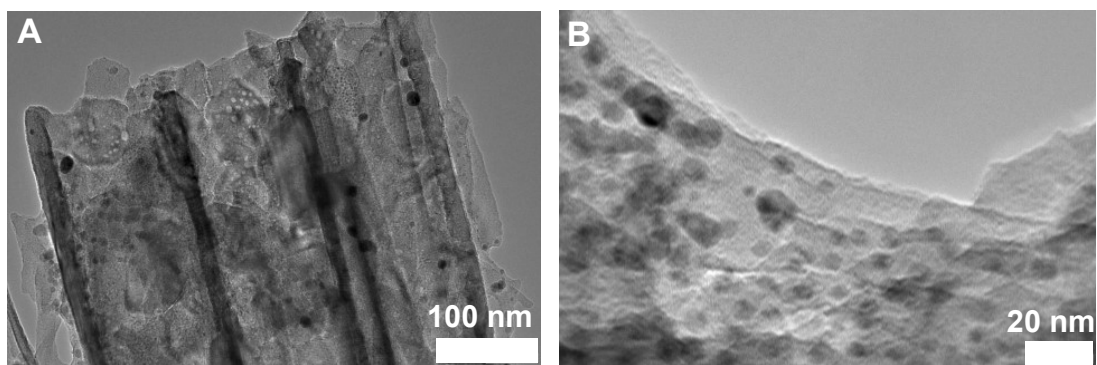

**Figure S6.** TEM images of Au@Meso-L-CuMOF/TiO<sub>2</sub>M.

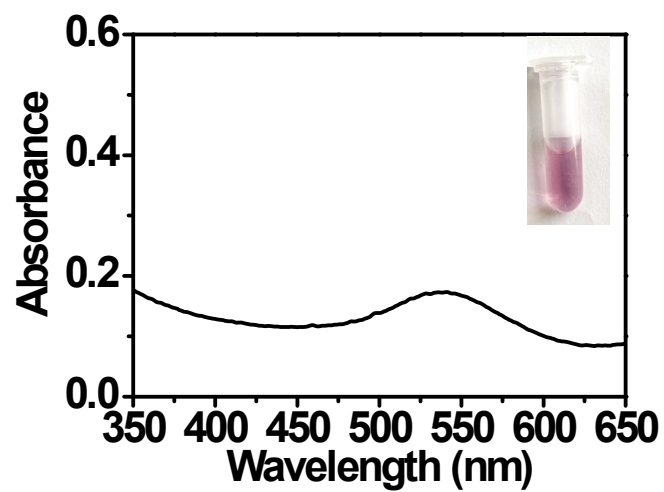

**Figure S7.** UV-Vis absorption spectrum of AuNPs peeled from Au@Meso-L-CuMOF/TiO<sub>2</sub>M. Inset image: the corresponding digital photographs of the AuNPs solution.

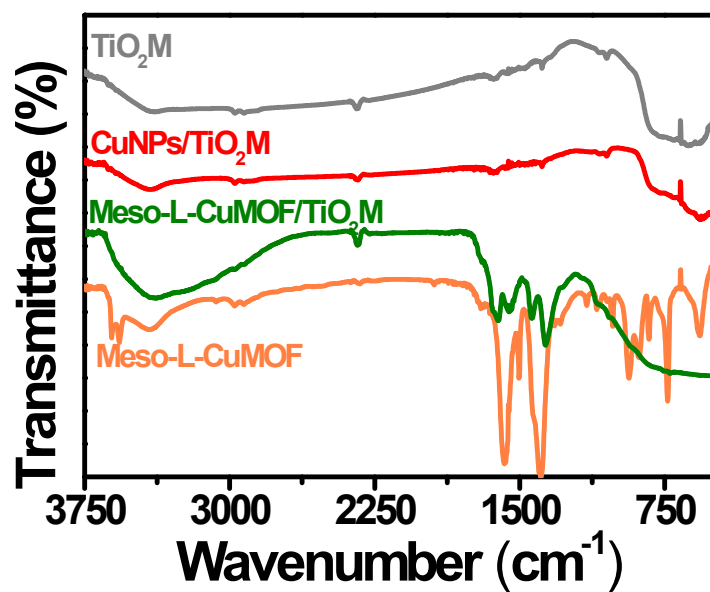

**Figure S8.** FTIR spectrum of TiO<sub>2</sub>M, CuNPs/TiO<sub>2</sub>M, Meso-L-CuMOF/TiO<sub>2</sub>M, and Meso-L-CuMOF.

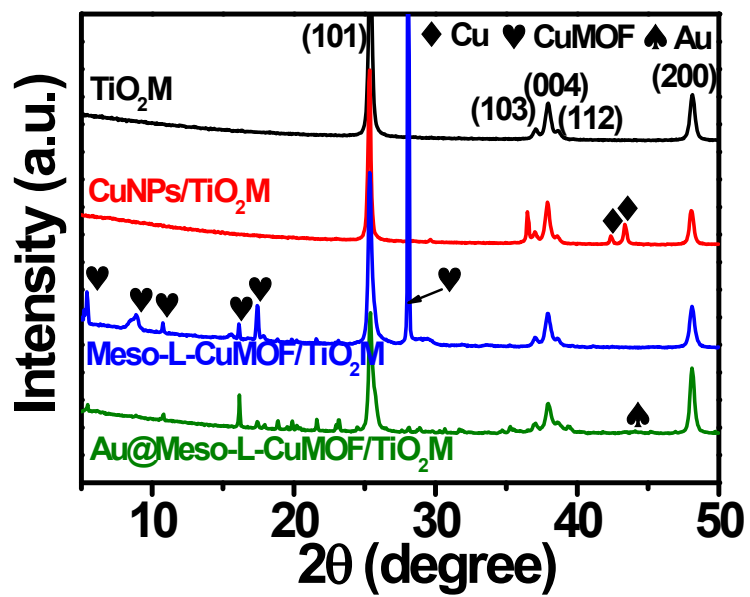

**Figure S9.** XRD patterns of  $\text{TiO}_2\text{M}$ ,  $\text{CuNPs}/\text{TiO}_2\text{M}$ ,  $\text{Meso-L-CuMOF}/\text{TiO}_2\text{M}$ , and  $\text{Au@Meso-L-CuMOF}/\text{TiO}_2\text{M}$ .

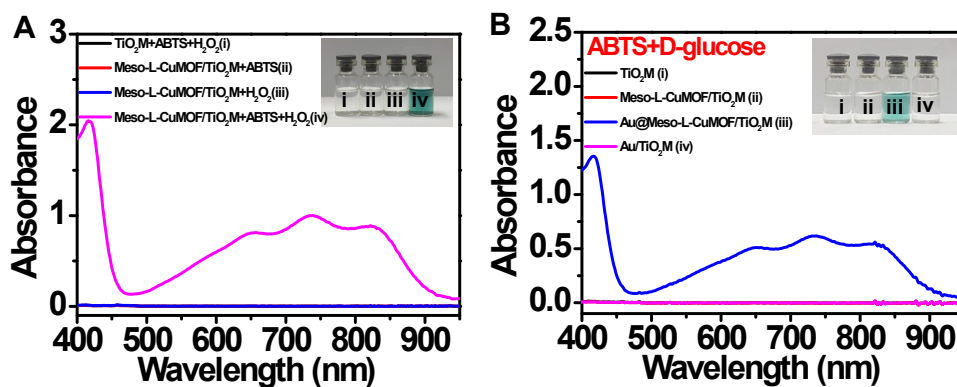

**Figure S10.** Colorimetric assay of POD-like reaction of Meso-L-CuMOF. (A) UV-vis spectra of different samples:  $\text{TiO}_2\text{M} + \text{ABTS} + \text{H}_2\text{O}_2$ , Meso-L-CuMOF/ $\text{TiO}_2\text{M} + \text{ABTS}$ , Meso-L-CuMOF/ $\text{TiO}_2\text{M} + \text{H}_2\text{O}_2$ , and Meso-L-CuMOF/ $\text{TiO}_2\text{M} + \text{ABTS} + \text{H}_2\text{O}_2$ . Colorimetric assay of glucose-like oxidase activity of Au@Meso-L-CuMOF/ $\text{TiO}_2\text{M}$ . (B) UV-vis spectra of different samples in 1.0 mM D-glucose and 1.0 mM ABTS. Inset image: the corresponding photographs of solutions corresponding to each curve.

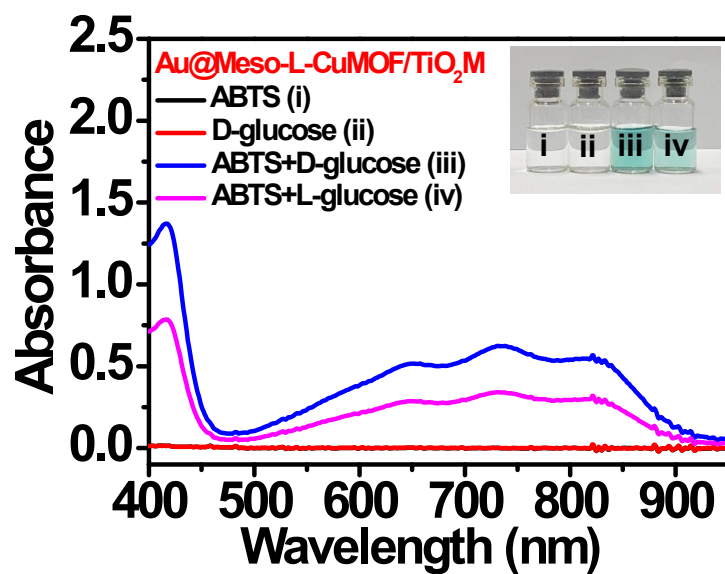

**Figure S11.** UV-vis spectra of Au@Meso-L-CuMOF/TiO<sub>2</sub>M in different solutions. Inset image: the photographs of solutions corresponding to each curve.

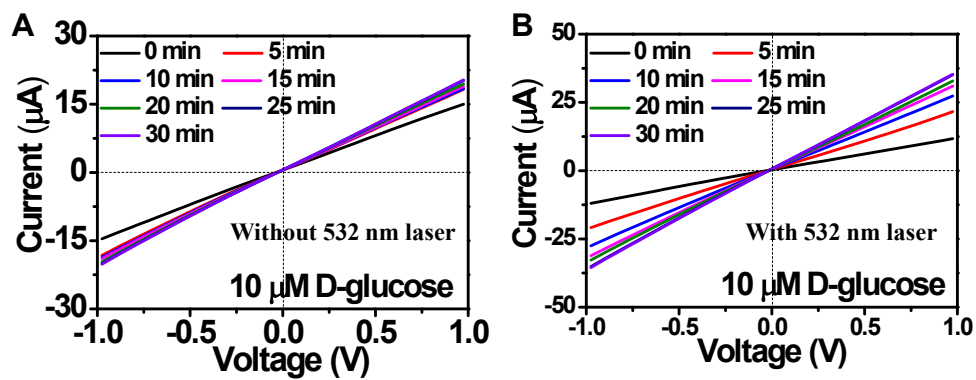

**Figure S12.** *I-V* properties of Au@Meso-L-CuMOF/TiO<sub>2</sub>M in the presence of 10 μM D-glucose without (A) and with (B) 532 nm laser.

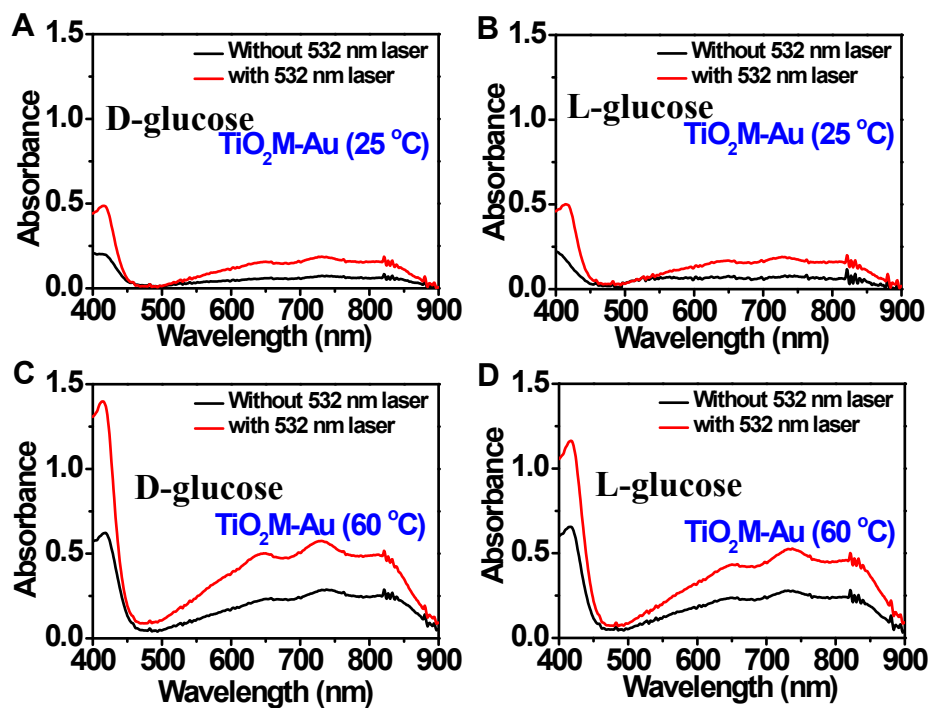

**Figure S13.** Colorimetric assay of glucose-like oxidase activity of AuNPs for D-glucose (A) and L-glucose (B) at 25 °C and D-glucose (C) and L-glucose (D) at 60 °C with and without 532 nm laser irradiation.



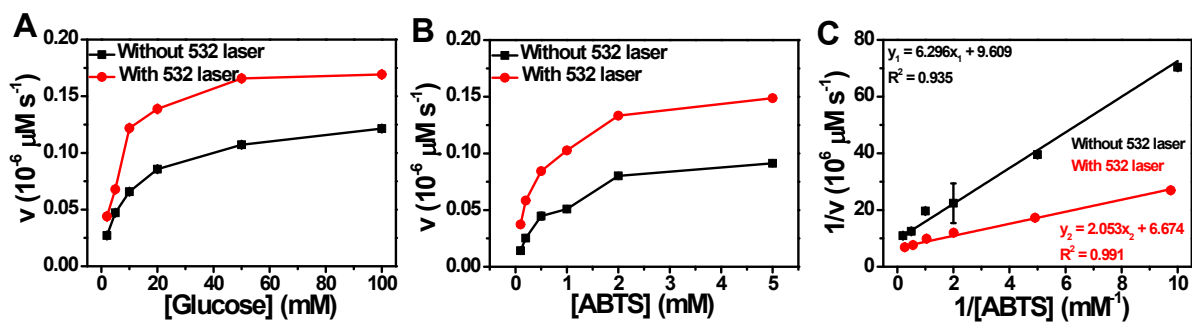

**Figure S14.** Steady-state kinetic assay for glucose-like oxidase activity of Au@Meso-L-CuMOF/TiO<sub>2</sub>M for (A) glucose and (B) ABTS. (C) Lineweaver-Burk plot of Au@Meso-L-CuMOF/TiO<sub>2</sub>M by the variation in ABTS.

**Table S1.** Kinetic parameters for glucose oxidase-like activity of Au@Meso-L-CuMOF/TiO<sub>2</sub>M with glucose and ABTS as substrate.

|                                  | $K_m$ (mM) | $V_{max}$ ( $\mu\text{M/s}$ ) | $K_{cat}$ ( $\text{s}^{-1}$ ) | $K_{cat}/K_m$ ( $\text{s}^{-1} \text{mM}^{-1}$ ) |
|----------------------------------|------------|-------------------------------|-------------------------------|--------------------------------------------------|
| Without irradiation<br>(glucose) | 9.485      | 0.131                         | 6.001                         | 0.633                                            |
| With irradiation<br>(glucose)    | 7.308      | 0.184                         | 8.429                         | 1.153                                            |
| Without irradiation<br>(ABTS)    | 0.655      | 0.104                         | 4.764                         | 7.273                                            |
| With irradiation<br>(ABTS)       | 0.308      | 0.150                         | 6.871                         | 22.308                                           |

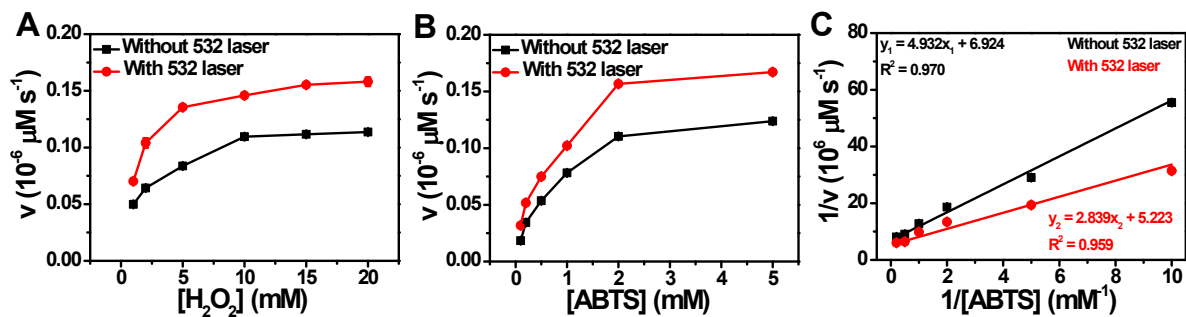

**Figure S15.** Steady-state kinetic assay for POD-like activity of Au@Meso-L-CuMOF/TiO<sub>2</sub>M for (A) H<sub>2</sub>O<sub>2</sub> and (B) ABTS. (C) Lineweaver-Burk plot of Au@Meso-L-CuMOF/TiO<sub>2</sub>M for the variation in ABTS.

**Table S2.** Kinetic parameters for the POD-like activity of Au@Meso-L-CuMOF/TiO<sub>2</sub>M with H<sub>2</sub>O<sub>2</sub> and ABTS as substrate.

|                                                         | $K_m$ (mM) | $V_{max}$ ( $\mu$ M/s) | $K_{cat}$ (s <sup>-1</sup> ) | $K_{cat}/K_m$ (s <sup>-1</sup> mM <sup>-1</sup> ) |
|---------------------------------------------------------|------------|------------------------|------------------------------|---------------------------------------------------|
| Without irradiation<br>(H <sub>2</sub> O <sub>2</sub> ) | 1.542      | 0.121                  | 5.543                        | 3.595                                             |
| With irradiation<br>(H <sub>2</sub> O <sub>2</sub> )    | 1.360      | 0.168                  | 7.696                        | 5.569                                             |
| Without irradiation<br>(ABTS)                           | 0.712      | 0.144                  | 6.596                        | 9.264                                             |
| With irradiation<br>(ABTS)                              | 0.543      | 0.191                  | 8.749                        | 16.112                                            |

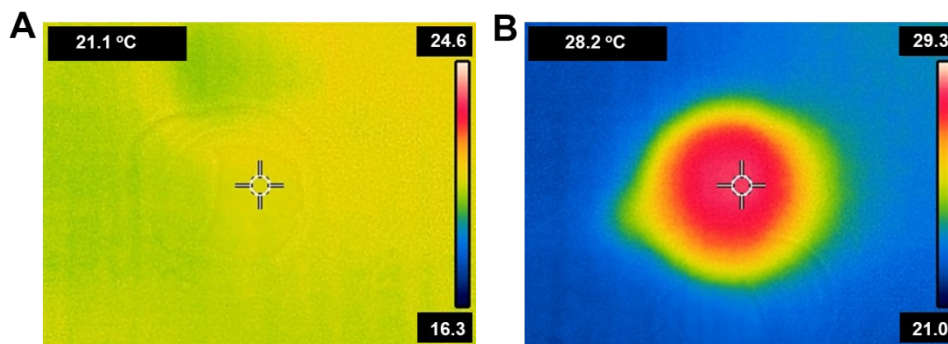

**Figure S16.** Infrared thermal imaging photographs of Au@Meso-L-CuMOF/TiO<sub>2</sub>M under 532-nm laser irradiation for (A) 0 min and (B) 30 min.

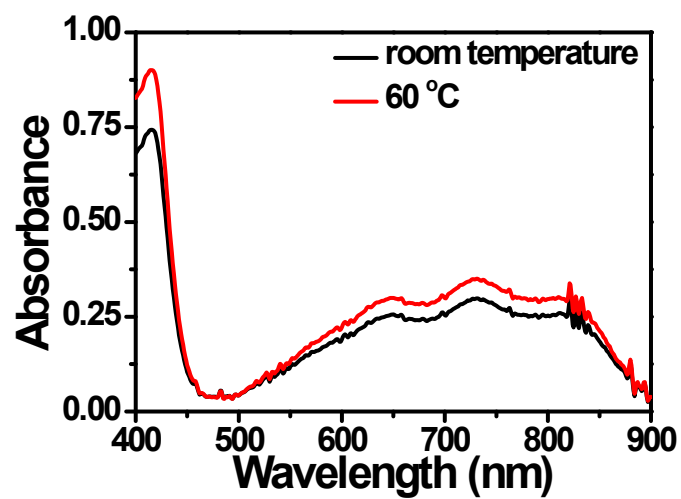

**Figure S17.** Effect of temperature on Fenton-like activity of Meso-L-CuMOF, determined through colorimetric assay.

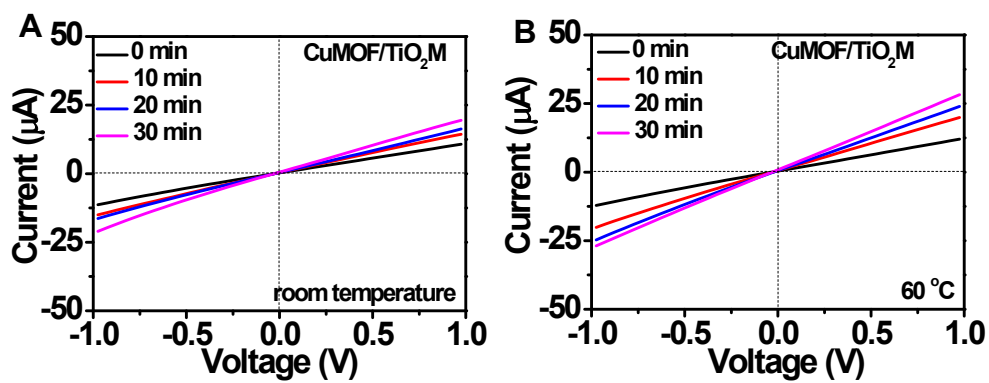

**Figure S18.** Effect of temperature (A) 25 °C and (B) 60 °C on Fenton-like activity of Meso-L-CuMOF through  $I-V$  assay.

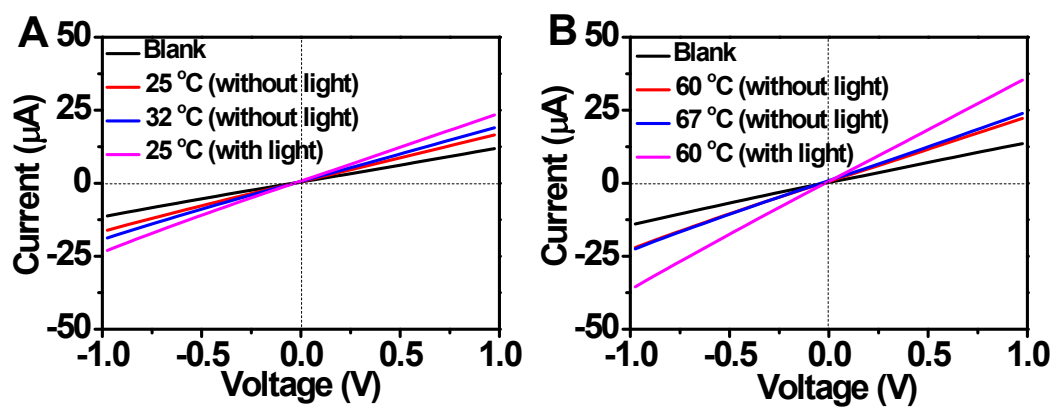

**Figure S19.** Influence of the temperature and 532 nm-laser irradiation on  $I$ - $V$  curves of Au@Meso-CuMOF/TiO<sub>2</sub>M for 10 μM D-glucose at (A) lower temperatures and (B) higher temperatures.



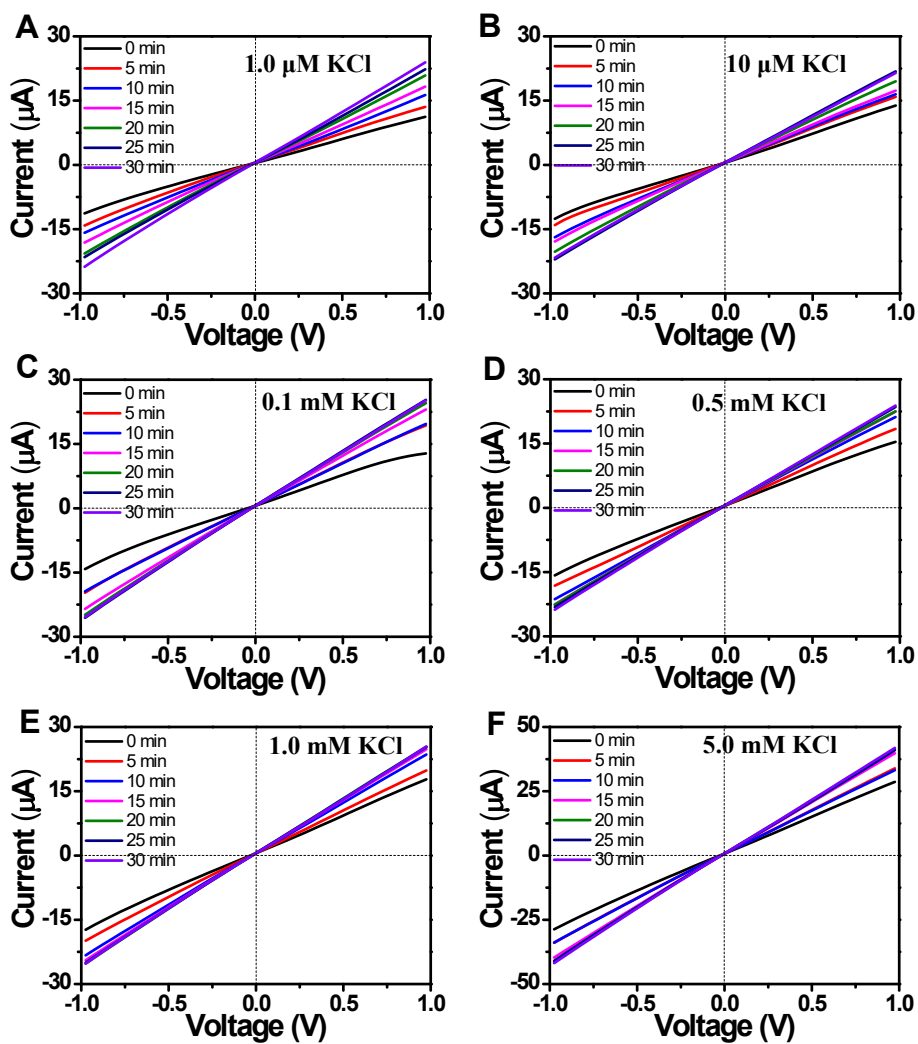

**Figure S20.** *I-V* properties of Au@Meso-L-CuMOF/TiO<sub>2</sub>M in the presence of 10 μM D-glucose in different concentration of KCl (A) 1.0 μM, (B) 10 μM, (C) 0.1 mM, (D) 0.5 mM, (E) 1.0 mM, and (F) 5.0 mM.

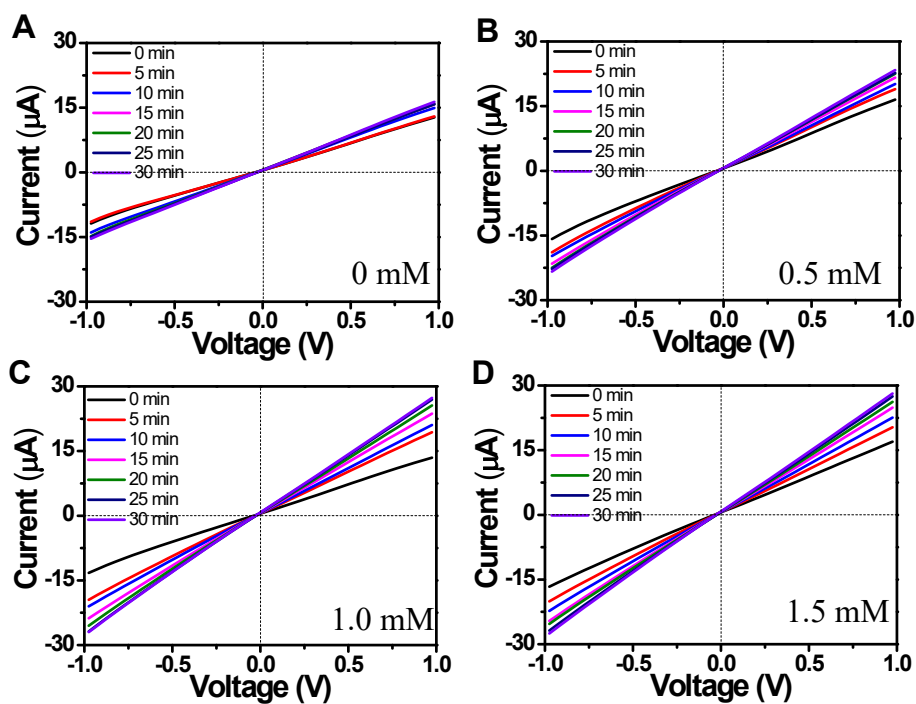

**Figure S21.** *I-V* properties of Au@Meso-L-CuMOF/TiO<sub>2</sub>M in the presence of 10 μM D-glucose under different concentration of ABTS (A) 0 mM, (B) 0.5 mM, (C) 1.0 mM, and (D) 1.5 mM.

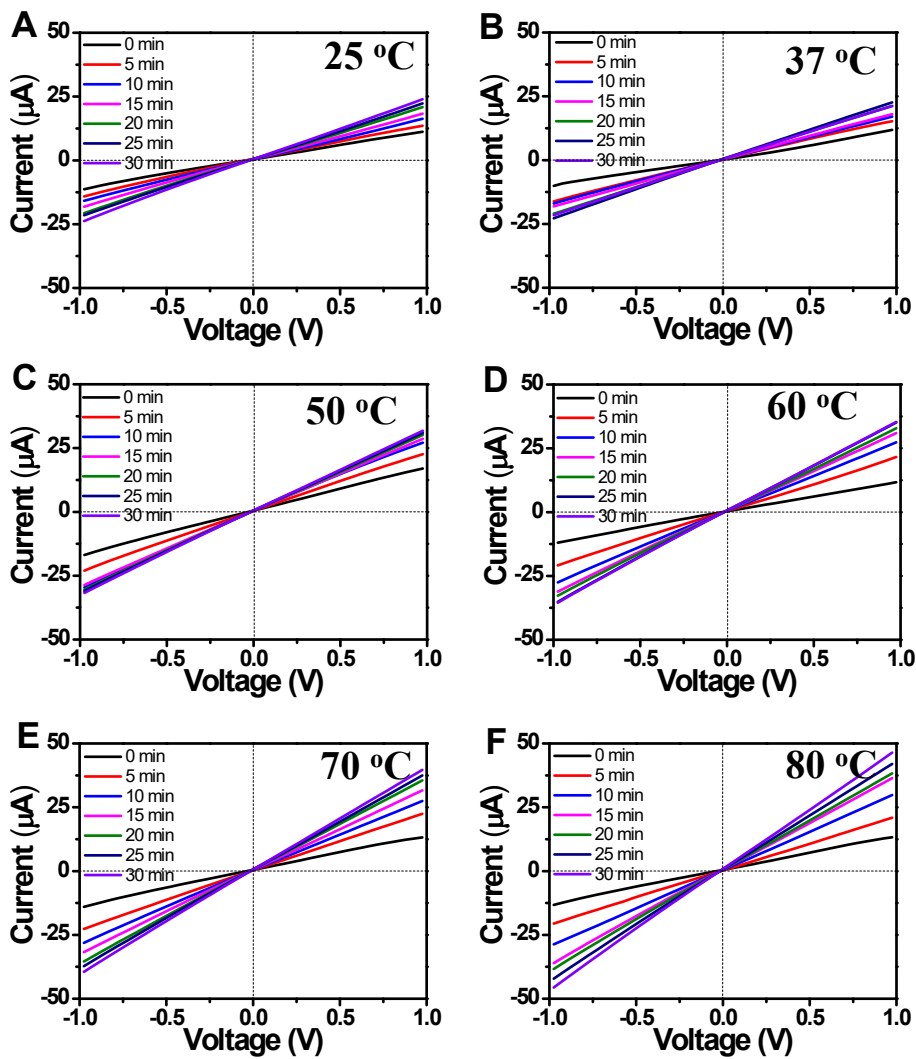

**Figure S22.** *I-V* properties of Au@Meso-L-CuMOF/TiO<sub>2</sub>M in the presence of 10 μM D-glucose at different reaction temperature (A) 25 °C, (B) 37 °C, (C) 50 °C, (D) 60 °C, (E) 70 °C, and (F) 80 °C.

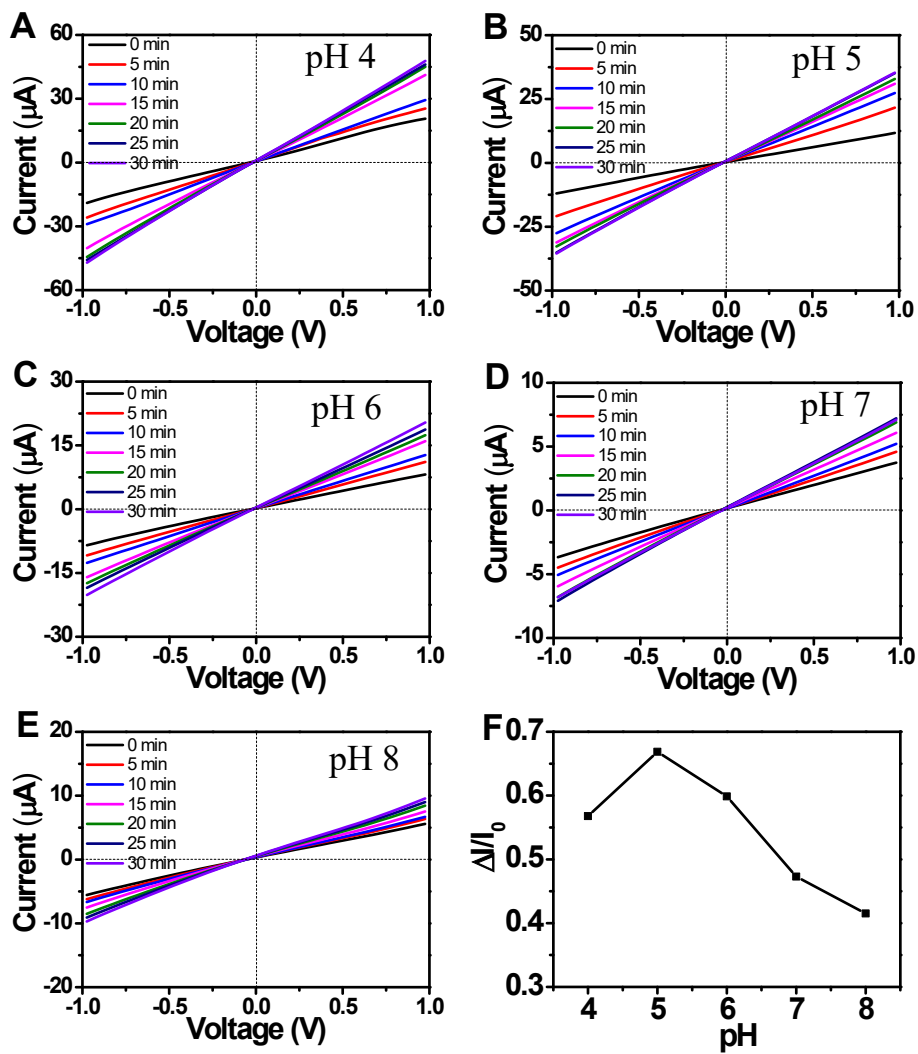

**Figure S23.** *I-V* properties of Au@Meso-L-CuMOF/TiO<sub>2</sub>M in the presence of 10 μM D-glucose at different pH (A) 4 (B) 5 (C) 6 (D) 7, and (E) 8. (F) Ionic current change rate ( $\Delta I/I_0$ ) at +1.0 V in the presence of 10 μM D-glucose at different pH.

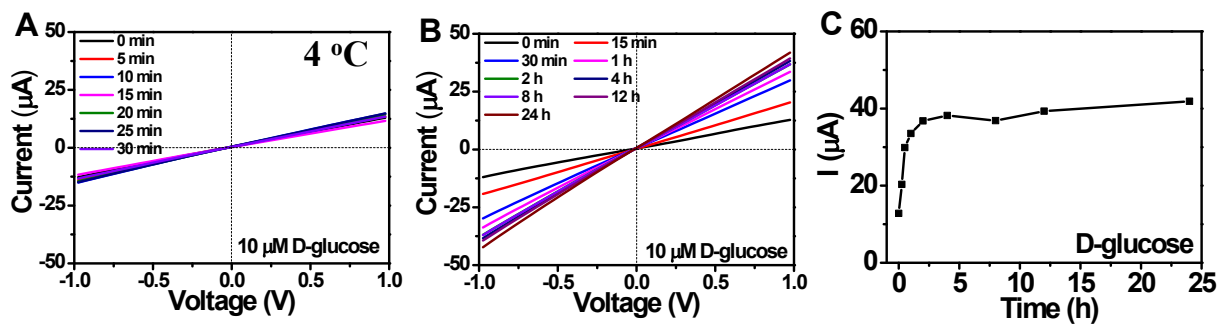

**Figure S24.** (A) *I-V* properties of Au@Meso-L-CuMOF/TiO<sub>2</sub>M in the presence of 10 μM D-glucose at 4 °C. (B) *I-V* properties of Au@Meso-L-CuMOF/TiO<sub>2</sub>M for identifying 10 μM D-glucose at a different time at 4 °C. (C) Ionic current at +1.0 V for identifying 10 μM D-glucose with varying times at 4 °C.

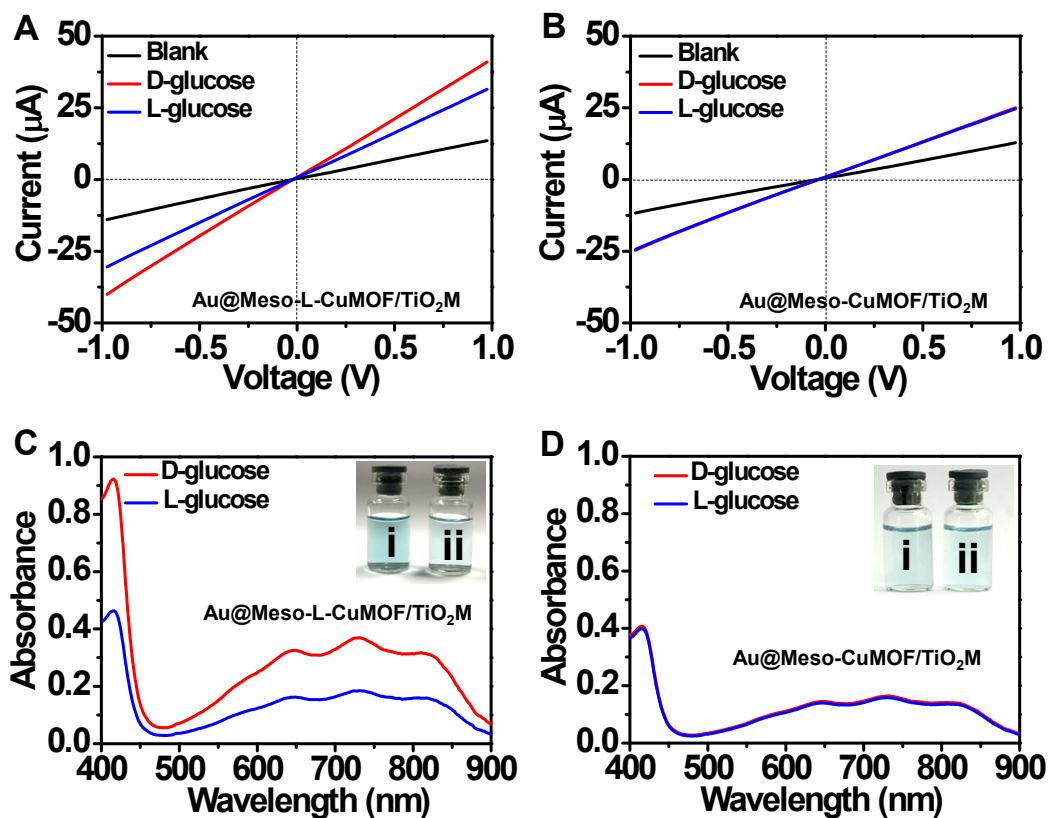

**Figure S25.** *I-V* curves of (A) Au@Meso-L-CuMOF/TiO<sub>2</sub>M and (B) Au@Meso-CuMOF/TiO<sub>2</sub>M in the presence of 10 μM L/D-glucose under 532 nm-laser irradiation. UV-vis spectra of (C) Au@Meso-L-CuMOF/TiO<sub>2</sub>M and (D) Au@Meso-CuMOF/TiO<sub>2</sub>M in 10 μM L/D-glucose and 1.0 mM ABTS. Inset image: the corresponding photographs of solutions corresponding to each curve.

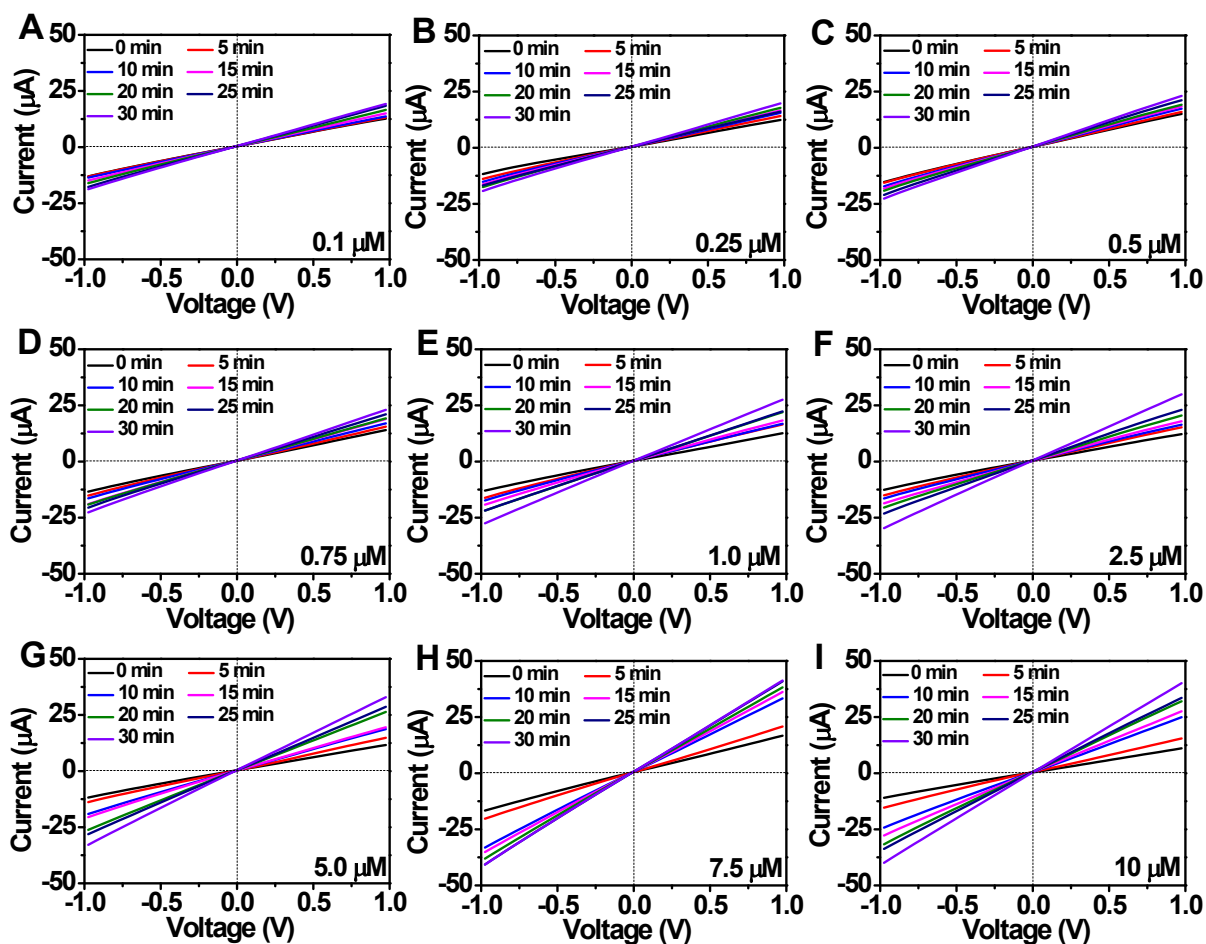

**Figure S26.**  $I$ - $V$  curves for sensing different concentrations of D-glucose (A) 0.1  $\mu\text{M}$ , (B) 0.25  $\mu\text{M}$ , (C) 0.5  $\mu\text{M}$ , (D) 0.75  $\mu\text{M}$ , (E) 1.0  $\mu\text{M}$ , (F) 2.5  $\mu\text{M}$ , (G) 5.0  $\mu\text{M}$ , (H) 7.5  $\mu\text{M}$ , and (I) 10  $\mu\text{M}$ . Electrochemical measurements were performed in an aqueous solution containing 1.0  $\mu\text{M}$  KCl, and 1.0 mM ABTS.

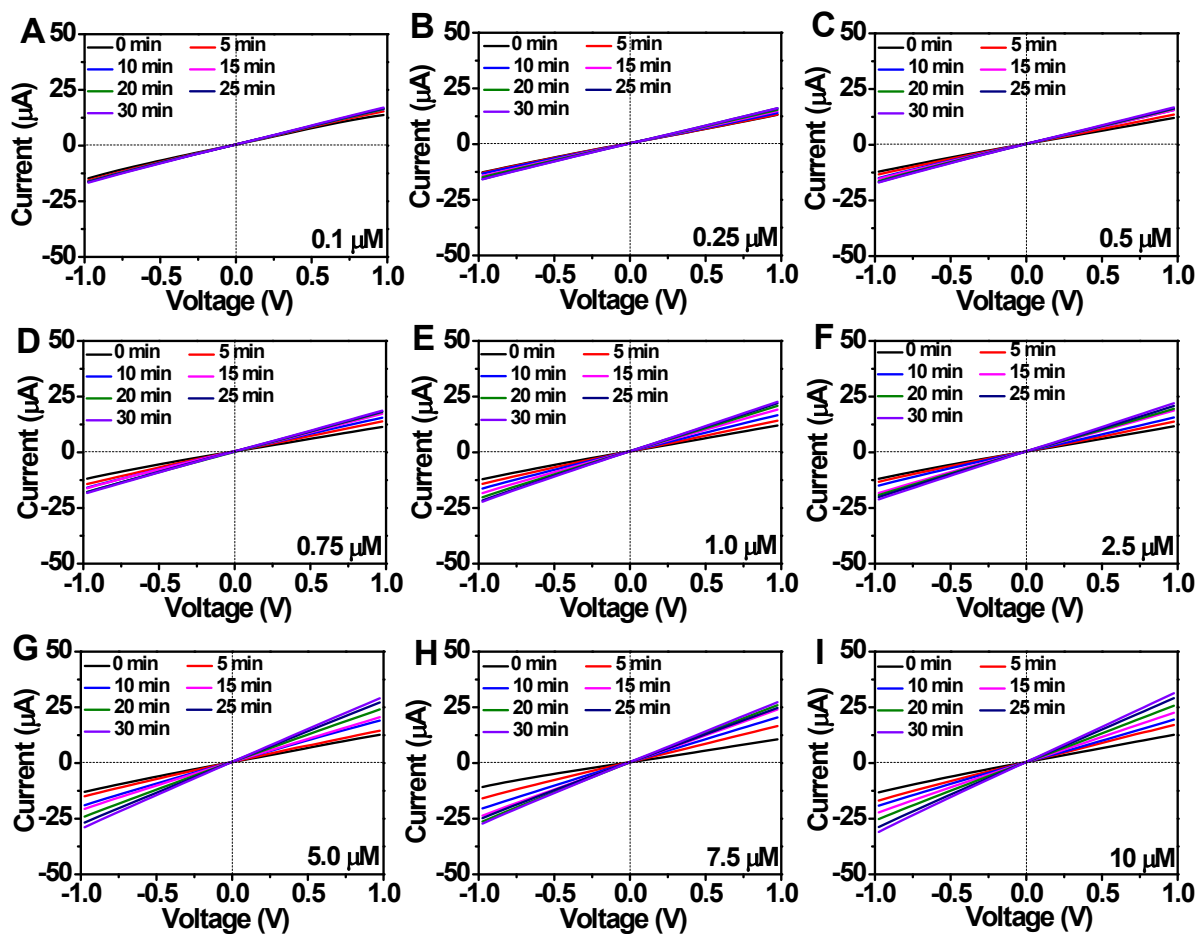

**Figure S27.**  $I$ - $V$  curves for sensing different concentrations of L-glucose (A) 0.1  $\mu\text{M}$ , (B) 0.25  $\mu\text{M}$ , (C) 0.5  $\mu\text{M}$ , (D) 0.75  $\mu\text{M}$ , (E) 1.0  $\mu\text{M}$ , (F) 2.5  $\mu\text{M}$ , (G) 5.0  $\mu\text{M}$ , (H) 7.5  $\mu\text{M}$ , and (I) 10  $\mu\text{M}$ . Electrochemical measurements were performed in an aqueous solution containing 1.0  $\mu\text{M}$  KCl, and 1.0 mM ABTS.



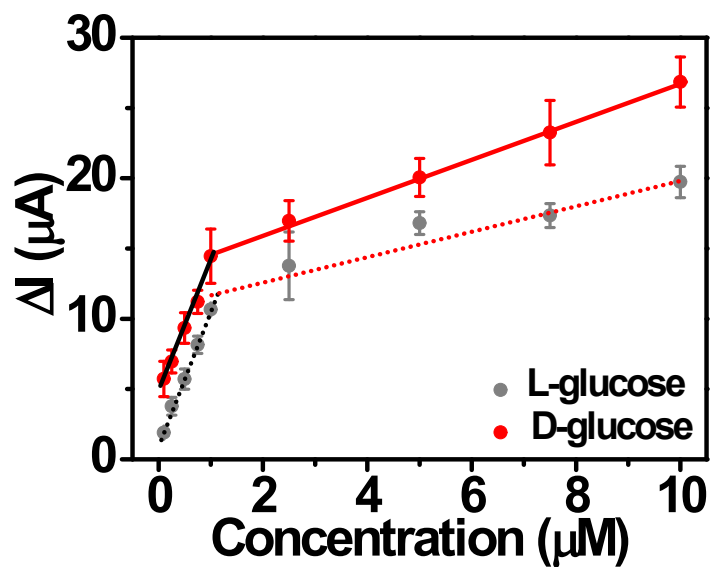

**Figure S28.** Ionic current changes ( $\Delta I$ ) at +1.0 V and the corresponding calibration plots for different concentrations of L/D-glucose.

In Figure S28,  $\Delta I$ , defined as  $\Delta I = I_0 - I$ , where  $I_0$  and  $I$  are defined as the ionic current at +1.0 V, derived from  $I$ - $V$  curves recorded in an electrolyte containing 1.0 mM ABTS after a 30 min reaction.

**Table S3.** Comparison of various methods for L/D-glucose detection.

| Method                                                               | Mechanism                                                                                                                                                                                                                        | LOD           | Reference |
|----------------------------------------------------------------------|----------------------------------------------------------------------------------------------------------------------------------------------------------------------------------------------------------------------------------|---------------|-----------|
| Chiral nanochannel-based electrochemical method                      | The chiral nanochannels modified with a chiral pillar[6]arene-based host-guest system show a high chiral-driven ionic gate for glucose enantiomers                                                                               | 1 mM          | [S1]      |
| Gold nanoparticles (AuNPs) with DNA ligands-based colorimetric assay | Random-coiled DNA-capped nanoparticles preferentially catalyze the oxidation of L-glucose, and structured DNA-capped nanoparticles show higher activity toward D-glucose                                                         | 2 mM          | [S2]      |
| Chiral AuNP-based colorimetric strategy                              | AuNPs modified by polycationic $\alpha$ -cyclodextrin allowed for precise photocontrol recognition catalysis for chiral monosaccharides                                                                                          | 100 mM        | [S3]      |
| Achiral glucose receptor-based CD assay                              | Glucose receptor contains bis-ureidobenzenecarboxamido units, binding to D/L-glucose, expected to cause twisting in these chromophores, leading to strong CD signals                                                             | 40 $\mu$ M    | [S4]      |
| Self-activated cascade reaction based electrochemical assay          | AuNPs modified in Meso-L-CuMOF/TiO <sub>2</sub> M converts D-glucose (not L-glucose) into gluconic acid and H <sub>2</sub> O <sub>2</sub> , activating the POD-like activity of PB to trigger the ionic current response further | 0.089 $\mu$ M | This work |

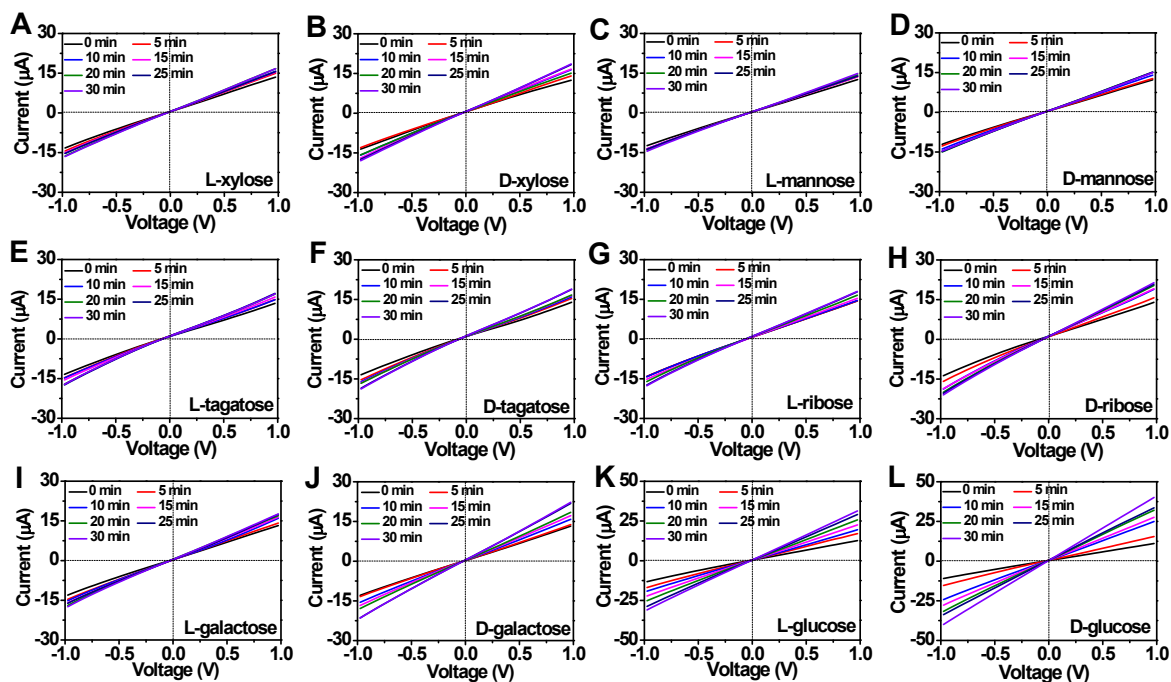

**Figure S29.**  $I$ - $V$  curves for sensing different chiral molecules (A) and (B) 10  $\mu$ M L/D-xylose, (C) and (D) 10  $\mu$ M L/D-mannose, (E) and (F) 10  $\mu$ M L/D-tagatose, (G) and (H) 10  $\mu$ M L/D-ribose, (I) and (J) 10  $\mu$ M L/D-galactose, (K) and (L) 10  $\mu$ M L/D-glucose. Electrochemical measurements were performed in an aqueous solution containing 1.0 mM ABTS and 1.0  $\mu$ M KCl solution.

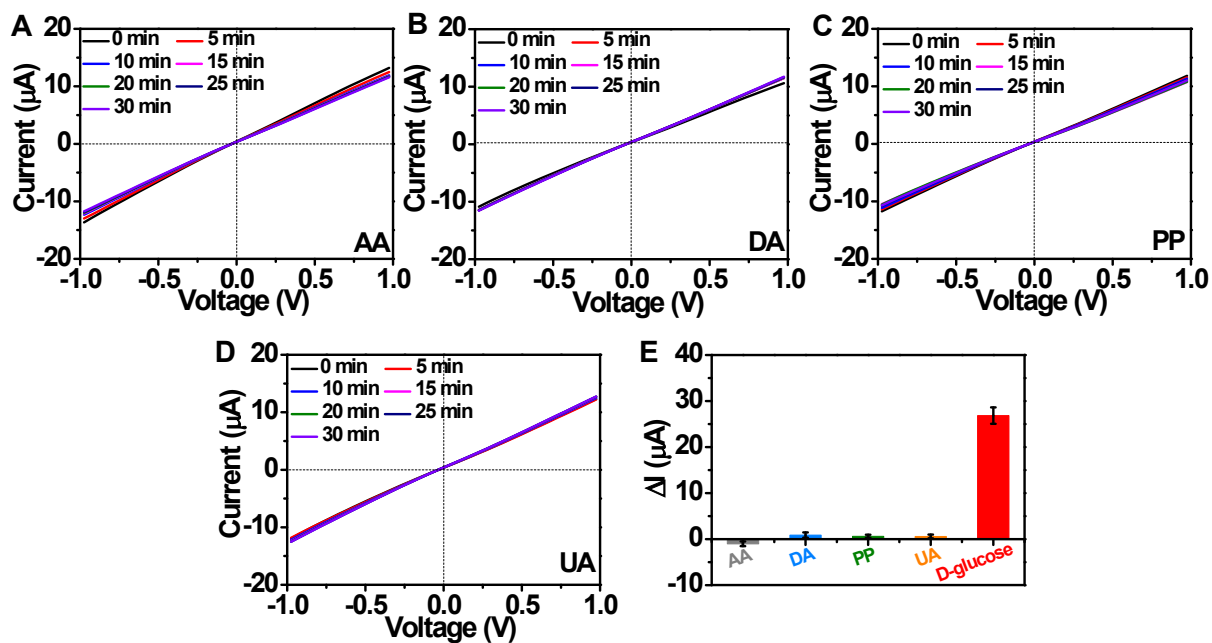

**Figure S30.**  $I-V$  curves for sensing different interfering species (A) 10  $\mu\text{M}$  AA, (B) 10  $\mu\text{M}$  DA, (C) 10  $\mu\text{M}$  UA, (D) 10  $\mu\text{M}$  PP, and (E) ionic current changes ( $\Delta I$ ) at +1.0 V in the presence of different interfering species. Electrochemical measurements were performed in an aqueous solution containing 1.0 mM ABTS and 1.0  $\mu\text{M}$  KCl solution. The concentration of each interfering species was 10  $\mu\text{M}$ , and the D-glucose concentration was 10  $\mu\text{M}$ .

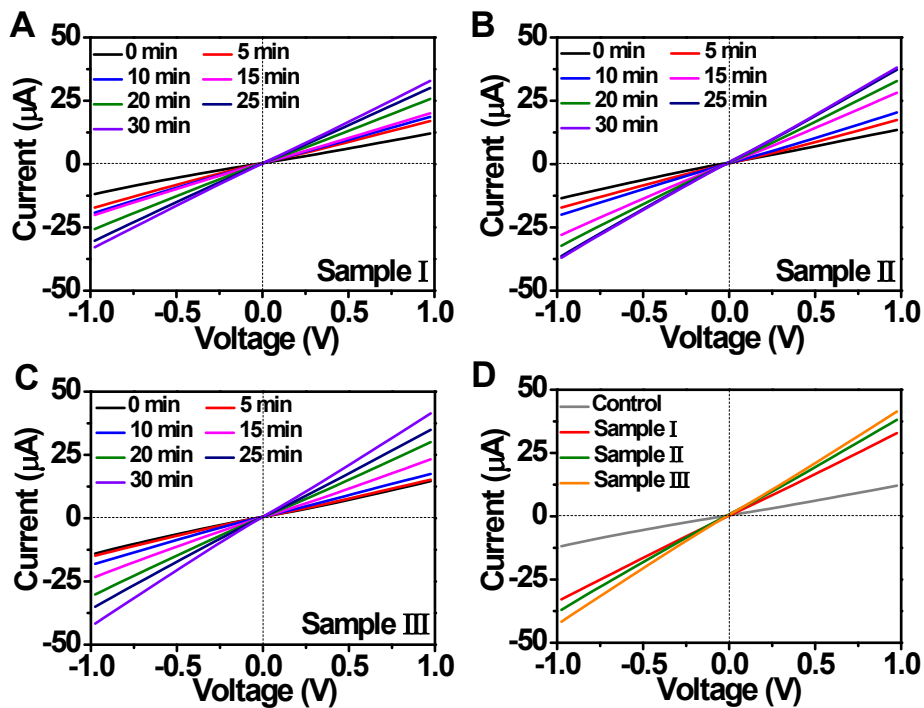

**Figure S31.** (A-C)  $I-V$  curves for sensing D-glucose in serum samples. (D)  $I-V$  curves for sensing D-glucose in serum samples after reaction 30 min. In real serum samples, electrochemical measurements were performed in an aqueous solution containing 1.0 mM ABTS and 1.0  $\mu\text{M}$  KCl.

**Table S4.** Detection of D-glucose in real serum samples using the proposed method.

| Sample     | Known concentration<br>(mmol L <sup>-1</sup> ) | Detected concentration<br>(mmol L <sup>-1</sup> ) | Recovery | RSD   |
|------------|------------------------------------------------|---------------------------------------------------|----------|-------|
| Sample I   | 5.23                                           | 5.38 ± 0.11                                       | 102.88%  | 1.89% |
| Sample II  | 8.53                                           | 8.52 ± 0.23                                       | 99.88%   | 1.05% |
| Sample III | 9.63                                           | 9.69 ± 0.34                                       | 100.62%  | 2.36% |

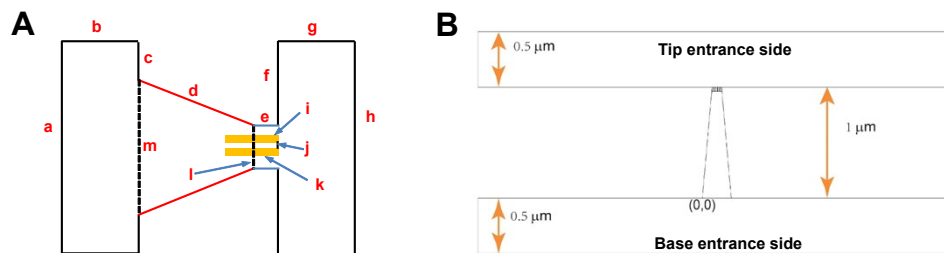

**Figure S32.** (A) Calculation model of 2D computation domain for heterochannels (Note that the figure is not drawn to scale). (B) Computer domain and boundaries of FEM models.

To calculate the ion distribution, the Comsol Multiphysics 5.5 was used with the “electrostatics (Poisson equation)” and “Nernst-Planck without Electroneutrality” modules. As schematically presented in Figure S25a, the Meso-L-CuMOF nanocrystals are located at the tip-entrance side of  $\text{TiO}_2\text{M}$ . The pore size of Meso-L-CuMOF is  $\sim 7.5$  nm (Figure 2E), and the spacing between the holes of CuTCA is 0.7 nm.<sup>[S5]</sup> The thickness of Meso-L-CuMOF is 3.5 μm, based on the SEM image (Figure 1F).

**Table S5.** Boundary conditions of FEM models.

| Boundary      | Poisson equation                     | Nerst-Planck equation |
|---------------|--------------------------------------|-----------------------|
| a, h          | $V_a$ =applied voltage;<br>$V_h=0$ V | Concentration         |
| d, l, i, k    | Surface charge                       | Insulation/symmetry   |
| b, c, e, f, g | Zero charge/symmetry                 | Insulation/symmetry   |
| j, m          | Continuity                           | Insulation/symmetry   |

\*For concentrations of gluconic acid,  $H_2O_2$ , and  $ABTS^+$ , their concentrations are dependent on the catalyzed reaction equation (eq1, eq2, and eq.3)



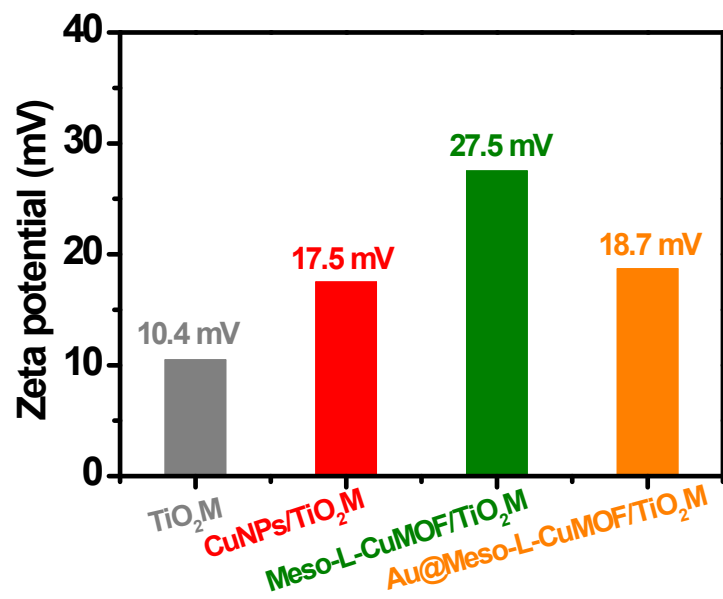

**Figure S33.** Zeta potential of each step modification in 1.0  $\mu$ M KCl solution (pH 5).

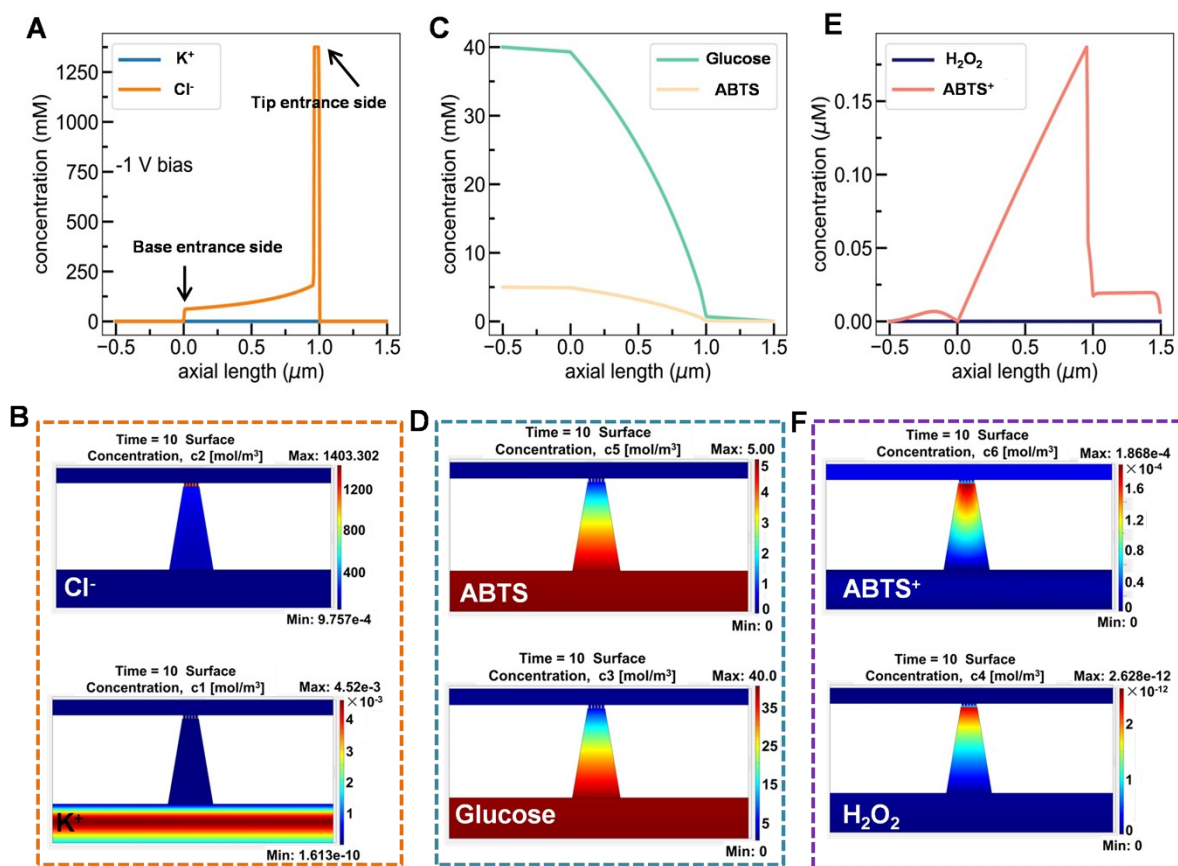

**Figure S34.** (A) Simulation concentration profiles of KCl and (B)  $Cl^-$  and  $K^+$  ions in nanochannel without enzyme catalytic reaction. (C) Simulation concentration profiles of glucose and ABTS along the nanochannel. (D) Simulated ionic concentration images of glucose and ABTS in a nanochannel. (E) Simulation concentration profiles of  $H_2O_2$  and  $ABTS^+$  along the nanochannel. (F) Simulated ionic concentration images of  $H_2O_2$  and  $ABTS^+$  in a nanochannel. The transmembrane voltage was set as  $-1.0$  V.

## References

- [1] Y. Sun, F. Zhang, J. Quan, F. Zhu, W. Hong, J. Ma, H. Pang, Y. Sun, D. Tian and H. Li, *Nat. Commun.*, 2018, **9**, 2617.
- [2] R. A. Tromans, S. K. Samanta, A. M. Chapman and A. P. Davis, *Chem. Sci.*, 2020, **11**, 3223.
- [3] P. Zhan, Z-G. Wang, N. Li and B. Ding, *ACS Catal.*, 2015, **5**, 1489.
- [4] L. Chen, Y. Chen, Y. Zhang and Y. Liu, *Angew. Chem. Int. Ed.*, 2021, **60**, 7654.
- [5] S. S.-Y. Chui, S. M.-F. Lo, J. P. H. Charmant, G. Orpen and I. D. Williams, *Science*, 1999, **283**, 1148.
